# Supplementary material
Source: HighWire-hosted journal article supplement (https://erj.ersjournals.com/content/55/5/2001017)
Supplement: inline-supplementary-material-1 [file inline-supplementary-material-1.pdf]

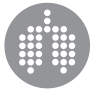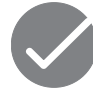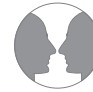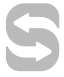

SHAREABLE PDF

# COVID-19: minimising risk to healthcare workers during aerosol-producing respiratory therapy using an innovative constant flow canopy

Yochai Adir<sup>1,2</sup>, Ori Segol<sup>1,2</sup>, Dmitry Kompaniets<sup>1,2</sup>, Hadas Ziso<sup>3</sup>, Yechiam Yaffe<sup>4</sup>, Irina Bergman<sup>1,2</sup>, Erez Hassidov<sup>3</sup> and Arie Edan<sup>1,2</sup>

**Affiliations:** <sup>1</sup>Lady Davis Carmel Medical Center, Pulmonary Division, Haifa, Israel. <sup>2</sup>The Faculty of Medicine, Technion Institute of Technology, Haifa, Israel. <sup>3</sup>Tamar Robotic LTD, Yagur, Israel. <sup>4</sup>Yafit Safety & Environment, Mevasseret Zion, Israel.

**Correspondence:** Yochai Adir, Lady Davis Carmel Medical Center, Pulmonary Division, 7 Micahl St, Haifa, 3436212, Israel. E-mail: adir-sh@zahav.net.il

 @ERSpublications

**An innovative constant flow canopy enables noninvasive respiratory support with minimal risk of healthcare worker infection** <https://bit.ly/3eqgoVZ>

**Cite this article as:** Adir Y, Segol O, Kompaniets D, *et al.* COVID-19: minimising risk to healthcare workers during aerosol-producing respiratory therapy using an innovative constant flow canopy. *Eur Respir J* 2020; 55: 2001017 [<https://doi.org/10.1183/13993003.01017-2020>].

This single-page version can be shared freely online.

## *To the Editor:*

Noninvasive ventilation (NIV), continuous positive airway pressure (CPAP) and high-flow nasal cannula (HFNC) can be used as the first line of treatment in coronavirus disease 2019 (COVID-19) patients with respiratory failure, postponing and maybe even avoiding the need for intubation and mechanical ventilation [1]. Recent systematic review and meta-analysis demonstrated that HFNC reduces the need for intubation compared with conventional oxygen, with no change in the death risk or length of stay in the intensive care unit [2, 3]. No direct evidence supports the use of NIV, due to a high failure rate [4]. However, when resources become limited, with no option of invasive ventilation, the use of NIV may be justified. The major caveat of using noninvasive respiratory support in the face of the COVID-19 pandemic is the generation of aerosols, composed of small virus-containing particles, which may remain suspended in the air, with increased risk for healthcare workers [5, 6]. The risk of aerosolisation depends on many variables, including duration of use, flow velocity, mask leakage and patient coughing and cooperation.
